# Supplementary material for: ATG4B and pS383/392-ATG4B serve as potential biomarkers and therapeutic targets of colorectal cancer
Source: Springer Nature journal article supplement (doi:10.1186/s12935-023-02909-7), 2023-04-10

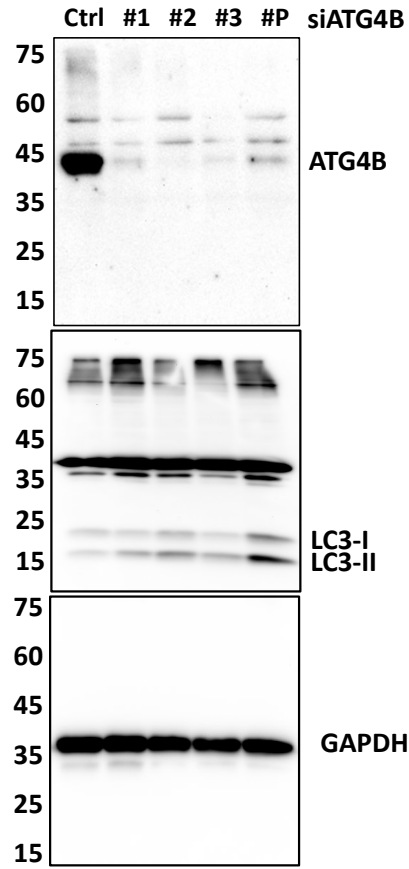

Supplement: MOESM1 [file 25225768]
