# Supplementary material for: ATG4B and pS383/392-ATG4B serve as potential biomarkers and therapeutic targets of colorectal cancer
Source: Springer Nature journal article supplement (doi:10.1186/s12935-023-02909-7), 2023-04-10
Supplement: MOESM2 [file 25225768]

**Table S1.** Impact of ATG4B expression levels on **overall survival** by the different demographic and clinicopathologic factors with colorectal cancer

| Variable                | ROC  | No. (%)    | CHR (95% CI)           | <i>p</i> value* | AHR (95% CI)     | <i>p</i> value <sup>†</sup> |
|-------------------------|------|------------|------------------------|-----------------|------------------|-----------------------------|
| Sex                     |      |            |                        |                 |                  |                             |
| Female                  | Low  | 92 (75.4)  | 1                      |                 | 1                |                             |
|                         | High | 30 (24.6)  | 1.38 (0.57-3.34)       | 0.472           | 1.53 (0.63-3.72) | 0.353 <sup>a</sup>          |
| Male                    | Low  | 109 (73.2) | 1                      |                 | 1                |                             |
|                         | High | 40 (26.8)  | 1.03 (0.50-2.11)       | <b>0.046</b>    | 1.69 (0.89-3.19) | 0.108 <sup>a</sup>          |
| Age, yrs                |      |            |                        |                 |                  |                             |
| ≤ 70                    | Low  | 120 (74.5) | 1                      |                 | 1                |                             |
|                         | High | 41 (25.5)  | 1.59 (0.73-3.48)       | 0.248           | 1.65 (0.75-3.63) | 0.214 <sup>a</sup>          |
| > 70                    | Low  | 81 (73.6)  | 1                      |                 | 1                |                             |
|                         | High | 29 (26.4)  | 1.84 (0.95-3.59)       | 0.072           | 1.56 (0.79-3.06) | 0.201 <sup>a</sup>          |
| AJCC pathological stage |      |            |                        |                 |                  |                             |
| I, II                   | Low  | 119 (78.3) | 1                      |                 |                  |                             |
|                         | High | 33 (21.7)  | 1.20 (0.49-2.92)       | 0.686           |                  |                             |
| III, IV                 | Low  | 82 (68.9)  | 1                      |                 |                  |                             |
|                         | High | 37 (31.1)  | 1.71 (0.91-3.21)       | 0.094           |                  |                             |
| T classification        |      |            |                        |                 |                  |                             |
| T1, T2                  | Low  | 41 (87.2)  | 1                      |                 | 1                |                             |
|                         | High | 6 (12.8)   | 0.041 (0.00-256657.48) | 0.689           | 0.00 (0.00-)     | 0.990 <sup>b</sup>          |
| T3, T4                  | Low  | 160 (71.4) | 1                      |                 | 1                |                             |
|                         | High | 64 (28.6)  | 1.61 (0.96-2.71)       | 0.070           | 1.58 (0.94-2.65) | 0.085 <sup>b</sup>          |
| N classification        |      |            |                        |                 |                  |                             |
| N0                      | Low  | 123 (78.3) | 1                      |                 | 1                |                             |
|                         | High | 34 (21.7)  | 1.35 (0.58-3.12)       | 0.486           | 1.21 (0.52-2.82) | 0.665 <sup>c</sup>          |
| N1, N2                  | Low  | 78 (68.4)  | 1                      |                 | 1                |                             |
|                         | High | 36 (31.6)  | 1.55 (0.81-2.97)       | 0.181           | 1.59 (0.83-3.05) | 0.164 <sup>c</sup>          |

Abbreviations: CHR, crude hazard ratio; CI, confidence interval; AHR, adjusted hazard ratio; AJCC, American Joint Committee on Cancer

\**p* values were estimated by Cox's regression.

<sup>†</sup>*p* values were estimated by multivariate Cox's regression.

<sup>a</sup>Adjusted for AJCC pathological stage (stage III+ IV vs stage I+II).

<sup>b</sup>Adjusted for N classification (N1, N2 vs N0).

<sup>c</sup>Adjusted for T classification (T3, T4 vs T1+T2).

**Table S1.** Impact of ATG4B expression levels on **progression-free interval survival** by the different demographic and clinicopathologic factors with colorectal cancer

| Variable                | ROC  | No. (%)    | CHR (95% CI)        | <i>p</i> value* | AHR (95% CI)     | <i>p</i> value <sup>†</sup> |
|-------------------------|------|------------|---------------------|-----------------|------------------|-----------------------------|
| Sex                     |      |            |                     |                 |                  |                             |
| Female                  | Low  | 91 (74.6)  | 1                   |                 | 1                |                             |
|                         | High | 31 (25.4)  | 0.81 (0.35-1.90)    | 0.631           | 0.78 (0.33-1.81) | 0.557 <sup>a</sup>          |
| Male                    | Low  | 108 (72.5) | 1                   |                 | 1                |                             |
|                         | High | 41 (27.5)  | 1.78 (1.01-3.15)    | <b>0.048</b>    | 1.53 (0.86-2.74) | 0.150 <sup>a</sup>          |
| Age, yrs                |      |            |                     |                 |                  |                             |
| ≤ 70                    | Low  | 118 (73.3) | 1                   |                 | 1                |                             |
|                         | High | 43 (26.7)  | 1.11 (0.60-2.05)    | 0.746           | 1.01 (0.54-1.88) | 0.967 <sup>a</sup>          |
| > 70                    | Low  | 81 (73.6)  | 1                   |                 | 1                |                             |
|                         | High | 29 (26.4)  | 1.84 (0.90-3.74)    | 0.094           | 1.62 (0.79-3.34) | 0.188 <sup>a</sup>          |
| AJCC pathological stage |      |            |                     |                 |                  |                             |
| I, II                   | Low  | 119 (78.3) | 1                   |                 | 1                |                             |
|                         | High | 33 (21.7)  | 1.55 (0.72-3.32)    | 0.260           |                  |                             |
| III, IV                 | Low  | 80 (67.2)  | 1                   |                 | 1                |                             |
|                         | High | 39 (32.8)  | 1.06 (0.59-1.92)    | 0.844           |                  |                             |
| T classification        |      |            |                     |                 |                  |                             |
| T1, T2                  | Low  | 41 (87.2)  | 1                   |                 | 1                |                             |
|                         | High | 6 (12.8)   | 0.39 (0.00-2342.03) | 0.564           | 0.00 (0.00-)     | 0.985 <sup>b</sup>          |
| T3, T4                  | Low  | 158 (70.5) | 1                   |                 | 1                |                             |
|                         | High | 66 (29.5)  | 1.27 (0.79-2.05)    | 0.318           | 1.18 (0.73-1.90) | 0.501 <sup>b</sup>          |
| N classification        |      |            |                     |                 |                  |                             |
| N0                      | Low  | 123 (78.3) | 1                   |                 | 1                |                             |
|                         | High | 34 (21.7)  | 1.64 (0.79-3.38)    | 0.184           | 1.46 (0.70-3.04) | 0.310 <sup>c</sup>          |
| N1, N2                  | Low  | 76 (66.7)  | 1                   |                 | 1                |                             |
|                         | High | 38 (33.3)  | 0.97 (0.53-1.79)    | 0.930           | 0.97 (0.52-1.78) | 0.910 <sup>c</sup>          |

Abbreviations: CHR, crude hazard ratio; CI, confidence interval; AHR, adjusted hazard ratio; AJCC, American Joint Committee on Cancer

\**p* values were estimated by Cox's regression.

<sup>†</sup>*p* values were estimated by multivariate Cox's regression.

<sup>a</sup>Adjusted for AJCC pathological stage (stage III+ IV vs stage I+II).

<sup>b</sup>Adjusted for N classification (N1, N2 vs N0).

<sup>c</sup>Adjusted for T classification (T3, T4 vs T1+T2).

**Table S1.** Impact of ATG4B expression levels on **disease-free interval survival** by the different demographic and clinicopathologic factors with colorectal cancer

| Variable                | ROC  | No. (%)   | CHR (95% CI)         | <i>p</i> value* | AHR (95% CI)         | <i>p</i> value <sup>†</sup> |
|-------------------------|------|-----------|----------------------|-----------------|----------------------|-----------------------------|
| Sex                     |      |           |                      |                 |                      |                             |
| Female                  | Low  | 29 (72.5) | 1                    |                 | 1                    |                             |
|                         | High | 11 (27.5) | 0.67 (0.07-6.12)     | 0.721           | 0.66 (0.07-6.02)     | 0.712 <sup>a</sup>          |
| Male                    | Low  | 41 (74.5) | 1                    |                 | 1                    |                             |
|                         | High | 14 (25.5) | 3.95 (1.05-14.84)    | <b>0.042</b>    | 3.98 (1.05-15.13)    | <b>0.043<sup>a</sup></b>    |
| Age, yrs                |      |           |                      |                 |                      |                             |
| ≤ 70                    | Low  | 46 (73.0) | 1                    |                 | 1                    |                             |
|                         | High | 17 (27.0) | 1.77 (0.42-7.55)     | 0.441           | 1.72 (0.40-7.46)     | 0.466 <sup>a</sup>          |
| > 70                    | Low  | 24 (75.0) | 1                    |                 | 1                    |                             |
|                         | High | 8 (25.0)  | 4.09 (0.82-20.45)    | 0.086           | 4.20 (0.83-21.28)    | 0.083 <sup>a</sup>          |
| AJCC pathological stage |      |           |                      |                 |                      |                             |
| I, II                   | Low  | 52 (76.5) | 1                    |                 | 1                    |                             |
|                         | High | 16 (23.5) | 1.61 (0.40-6.49)     | 0.500           |                      |                             |
| III, IV                 | Low  | 18 (66.7) | 1                    |                 | 1                    |                             |
|                         | High | 9 (33.3)  | 3.51 (0.58-21.08)    | 0.171           |                      |                             |
| T classification        |      |           |                      |                 |                      |                             |
| T1, T2                  | Low  | 19 (76.0) | 1                    |                 | 1                    |                             |
|                         | High | 6 (24.0)  | 0.31 (0.00-20280.22) | 0.611           | 0.31 (0.00-20280.22) | 0.611 <sup>b</sup>          |
| T3, T4                  | Low  | 51 (72.9) | 1                    |                 | 1                    |                             |
|                         | High | 19 (27.1) | 2.86 (0.92-8.92)     | 0.070           | 2.84 (0.90-8.99)     | 0.075 <sup>b</sup>          |
| N classification        |      |           |                      |                 |                      |                             |
| N0                      | Low  | 52 (77.6) | 1                    |                 | 1                    |                             |
|                         | High | 15 (22.4) | 1.12 (0.22-5.55)     | 0.893           | 1.11 (0.22-5.49)     | 0.903 <sup>c</sup>          |
| N1, N2                  | Low  | 18 (64.3) | 1                    |                 | 1                    |                             |
|                         | High | 10 (35.7) | 4.34 (0.79-23.87)    | 0.091           | 4.34 (0.79-23.87)    | 0.091 <sup>c</sup>          |

Abbreviations: CHR, crude hazard ratio; CI, confidence interval; AHR, adjusted hazard ratio; AJCC, American Joint Committee on Cancer

\**p* values were estimated by Cox's regression.

<sup>†</sup>*p* values were estimated by multivariate Cox's regression.

<sup>a</sup>Adjusted for AJCC pathological stage (stage III+ IV vs stage I+II).

<sup>b</sup>Adjusted for N classification (N1, N2 vs N0).

<sup>c</sup>Adjusted for T classification (T3, T4 vs T1+T2).
